# Supplementary material
Source: PubMed Central journal article supplement (PMC4174949)
Supplement: 815ff5c69e71dc1534fbcca2cb08a0a9_genetics.114.165613-10.pdf [file 815ff5c69e71dc1534fbcca2cb08a0a9_genetics.114.165613-10.pdf]

**Table S3** Accessions used for the *HvPHYC* re-sequencing and haplotype analysis.

| <i>Hordeum</i> species               | Genotype*             | Status             | Growth habit | Origin         | <i>HvPHYC</i> haplotype |
|--------------------------------------|-----------------------|--------------------|--------------|----------------|-------------------------|
| <i>vulgare</i> subsp. <i>vulgare</i> | Arta                  | cultivar           | winter       | Syria          | 1                       |
|                                      | <b>Asahi 5</b>        | cultivar           | n.d.**       | Japan          | 4                       |
|                                      | Azumamugi             | cultivar           | n.d.         | Japan          | 7                       |
|                                      | B.E. 22 (ASA)         | cultivar           | n.d.         | Pakistan       | 2                       |
|                                      | B1K-70-01             | cultivar           | spring       | Israel         | 1                       |
|                                      | B1K-70-02             | cultivar           | spring       | Israel         | 1                       |
|                                      | Bowman                | cultivar           | n.d.         | USA            | 14                      |
|                                      | <b>Bowman(eam5)</b>   | introgression line | spring       | n.d.           | 4                       |
|                                      | Dicktoo               | cultivar           | n.d.         | USA            | 15                      |
|                                      | Erectoides 16         | cultivar           | n.d.         | Sweden         | 1                       |
|                                      | G-391 F               | cultivar           | spring       | Italy          | 2                       |
|                                      | G-413 I               | cultivar           | n.d.         | Czech Republic | 1                       |
|                                      | Ghara 1 (1609)        | cultivar           | n.d.         | Nepal          | 3                       |
|                                      | Hamidiye 85           | cultivar           | spring       | Turkey         | 1                       |
|                                      | <b>Haruna Nijo</b>    | cultivar           | spring       | Japan          | 4                       |
|                                      | <b>Hayachinemugi</b>  | cultivar           | n.d.         | Japan          | 4                       |
|                                      | <b>Hayakiso 2</b>     | cultivar           | winter       | Japan          | 4                       |
|                                      | Hayakiso 3            | cultivar           | n.d.         | Japan          | 1                       |
|                                      | Indian dwarf          | cultivar           | n.d.         | n.d.           | 1                       |
|                                      | Indo Omugi            | cultivar           | spring       | Taiwan         | 1                       |
|                                      | <b>Ishuku Shirazu</b> | cultivar           | spring       | Japan          | 4                       |
|                                      | Kagoshima Gold        | cultivar           | n.d.         | Japan          | 1                       |
|                                      | <b>Kaikei 84</b>      | cultivar           | n.d.         | Japan          | 4                       |
|                                      | <b>Kanto Nijo 3</b>   | cultivar           | n.d.         | Japan          | 4                       |
|                                      | <b>Kawasaigoku</b>    | cultivar           | spring       | Japan          | 4                       |
|                                      | Keel                  | cultivar           | spring       | Australia      | 1                       |
|                                      | Kinai 5               | cultivar           | n.d.         | Japan          | 1                       |
|                                      | Kindoku               | cultivar           | n.d.         | Sweden         | 1                       |
|                                      | Kompolti              | cultivar           | n.d.         | Hungary        | 2                       |
|                                      | L871                  | cultivar           | spring       | Egypt          | 1                       |
|                                      | Mari                  | cultivar           | n.d.         | Sweden         | 1                       |
|                                      | Marthe                | cultivar           | spring       | Germany        | 1                       |
|                                      | Morex                 | cultivar           | spring       | USA            | 1                       |
| Mota 4 (1-24-13)                     | cultivar              | n.d.               | Ethiopia     | 1              |                         |
| Mota 6 (1-24-15)                     | cultivar              | n.d.               | Ethiopia     | 1              |                         |
| <b>Omugi 15</b>                      | cultivar              | n.d.               | Japan        | 4              |                         |

|                                            |                       |          |         |          |    |
|--------------------------------------------|-----------------------|----------|---------|----------|----|
|                                            | Rum                   | cultivar | n.d.    | Jordand  | 1  |
|                                            | <b>Saikai Kawa 24</b> | cultivar | n.d.    | Japan    | 4  |
|                                            | Shiga Hayakiso 1      | cultivar | n.d.    | Japan    | 1  |
|                                            | Sladoran              | cultivar | winter  | Turkey   | 2  |
|                                            | Tadmor                | cultivar | winter  | Syria    | 1  |
|                                            | Tainan 2              | cultivar | n.d.    | Taiwan   | 1  |
|                                            | Turkey 759            | cultivar | n.d.    | Turkey   | 1  |
|                                            | Yarmouk               | cultivar | n.d.    | Lebanon  | 2  |
|                                            | Yercil 147            | cultivar | winter  | Turkey   | 2  |
|                                            | Zairai 1              | cultivar | n.d.    | Taiwan   | 1  |
|                                            | Zairai 2              | cultivar | n.d.    | Taiwan   | 1  |
|                                            | B1K-55-01             | landrace | n.d.    | Israel   | 2  |
|                                            | B1K-55-02             | landrace | n.d.    | Israel   | 1  |
|                                            | B1K-55-06             | landrace | spring  | Israel   | 2  |
|                                            | G-1573 A              | landrace | n.d.    | Syria    | 1  |
|                                            | G-398 H               | landrace | n.d.    | Ethiopia | 2  |
|                                            | G-400 H               | landrace | n.d.    | Egypt    | 1  |
|                                            | G-404 H               | landrace | spring  | Tibet    | 3  |
|                                            | G-423 H               | landrace | n.d.    | Ethiopia | 1  |
|                                            | G-434 H               | landrace | n.d.    | Ethiopia | 1  |
|                                            | G-439 H               | landrace | spring  | Yemen    | 1  |
|                                            | G-440 E               | landrace | n.d.    | n.d.     | 1  |
|                                            | LR 1887               | landrace | n.d.    | n.d.     | 1  |
| <i>vulgare</i> subsp.<br><i>spontaneum</i> | B1K-02-18             | wild     | n.d.    | Israel   | 9  |
|                                            | B1K-03-07             | wild     | n.d.    | Israel   | 1  |
|                                            | B1K-05-13             | wild     | n.d.    | Israel   | 5  |
|                                            | B1K-08-13             | wild     | n.d.    | Israel   | 5  |
|                                            | B1K-08-18             | wild     | n.d.    | Israel   | 10 |
|                                            | B1K-13-01             | wild     | n.d.    | Israel   | 2  |
|                                            | B1K-17-13             | wild     | n.d.    | Israel   | 1  |
|                                            | B1K-21-02             | wild     | n.d.    | Israel   | 1  |
|                                            | B1K-22-06             | wild     | n.d.    | Israel   | 1  |
|                                            | B1K-22-10             | wild     | n.d.    | Israel   | 1  |
|                                            | B1K-33-13             | wild     | n.d.    | Israel   | 1  |
|                                            | HID-1                 | wild     | winter  | Iraq     | 1  |
|                                            | HID-10                | wild     | n.d.    | Iraq     | 1  |
|                                            | HID-101               | wild     | winter  | Syria    | 1  |
|                                            | HID-104               | wild     | n.d.    | Syria    | 13 |
|                                            | HID-107               | wild     | winter  | Jordan   | 2  |
|                                            | HID-109               | wild     | winter  | Syria    | 12 |
| HID-114                                    | wild                  | n.d.     | Lebanon | 1        |    |

|                     |           |      |        |        |    |
|---------------------|-----------|------|--------|--------|----|
|                     | HID-122   | wild | n.d.   | Jordan | 11 |
|                     | HID-136   | wild | winter | Iran   | 1  |
|                     | HID-137   | wild | n.d.   | Turkey | 13 |
|                     | HID-140   | wild | winter | Iraq   | 13 |
|                     | HID-145   | wild | n.d.   | Israel | 2  |
|                     | HID-2     | wild | n.d.   | Iraq   | 1  |
|                     | HID-24    | wild | n.d.   | Iran   | 3  |
|                     | HID-257   | wild | n.d.   | Israel | 1  |
|                     | HID-301   | wild | n.d.   | Iran   | 1  |
|                     | HID-309   | wild | n.d.   | Iran   | 2  |
|                     | HID-330-1 | wild | n.d.   | n.d.   | 1  |
|                     | HID-366   | wild | n.d.   | Iran   | 1  |
|                     | HID-377-1 | wild | n.d.   | Israel | 1  |
|                     | HID-377-2 | wild | n.d.   | Israel | 1  |
|                     | HID-44    | wild | n.d.   | Iran   | 1  |
|                     | HID-46    | wild | n.d.   | Iran   | 1  |
|                     | HID-54    | wild | n.d.   | Turkey | 2  |
|                     | HID-55    | wild | n.d.   | Turkey | 1  |
|                     | HID-56    | wild | n.d.   | Turkey | 1  |
|                     | HID-70    | wild | n.d.   | Turkey | 1  |
|                     | HID-85    | wild | n.d.   | Turkey | 1  |
|                     | HID-96    | wild | n.d.   | Jordan | 1  |
|                     | HID-99    | wild | winter | Syria  | 1  |
|                     | HP-02-3   | wild | n.d.   | Turkey | 1  |
|                     | HP-03-2   | wild | n.d.   | Turkey | 1  |
|                     | HP-10-4   | wild | n.d.   | Turkey | 1  |
|                     | HP-10-5   | wild | n.d.   | Turkey | 1  |
|                     | HP-11-1   | wild | n.d.   | Turkey | 1  |
|                     | HP-13-2   | wild | n.d.   | Turkey | 8  |
|                     | HP-15-3   | wild | winter | Turkey | 6  |
|                     | HP-15-5   | wild | winter | Turkey | 6  |
|                     | HP-24-1   | wild | winter | Turkey | 1  |
|                     | HP-26-1   | wild | winter | Turkey | 1  |
|                     | HP-27-2   | wild | winter | Turkey | 1  |
| <i>agriocrithon</i> | B1K-52-01 | wild | n.d.   | Israel | 1  |
|                     | HID-383-1 | wild | winter | China  | 3  |
|                     | HID-383-3 | wild | n.d.   | China  | 1  |

\* - genotypes carrying the wild-type *HvVRN1* allele are highlighted in bold; allelic composition at *HvVRN-H1* in other genotypes is unknown; \*\* - n.d., no data.
